# Supplementary material
Source: ML conference proceedings conference paper supplement (https://www.ecva.net/papers/eccv_2024/papers_ECCV/html/6103_ECCV_2024_paper.php)
Supplement: Supplementary file 1 [file 06103-supp.pdf]

# KFD-NeRF: Rethinking Dynamic NeRF with Kalman Filter

## Supplemental Material

Yifan Zhan<sup>1</sup>, Zhuoxiao Li<sup>1</sup>, Muyao Niu<sup>1</sup>, Zhihang Zhong<sup>3</sup>, Shohei Nobuhara<sup>2</sup>, Ko Nishino<sup>2</sup>, and Yinqiang Zheng<sup>\*1</sup>

<sup>1</sup> The University of Tokyo

<sup>2</sup> Kyoto University

<sup>3</sup> Shanghai Artificial Intelligence Laboratory

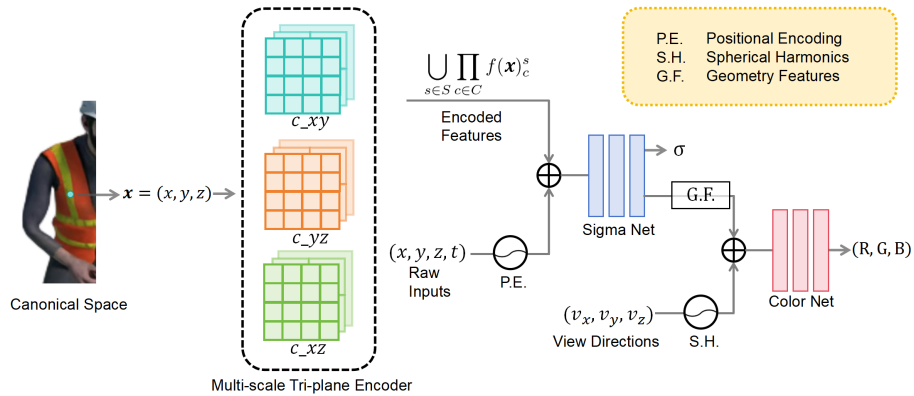

Fig. 1: Details of our spatial neural architectures.

## 1 Per-scene Results

We exhibit our per-scene results for synthetic data in Tab. 1 and for real data in Tab. 2. In Fig. 2 and Fig. 3 we additionally provide more visualization results on synthetic and real data.

## 2 Spatial Neural Architectures

We elaborate in detail on our spatial neural architectures in Fig. 1. Once obtaining the warped 3D points in the canonical space, we first use a multi-scale tri-plane to encode the spatial information. For each plane  $c \in C$  and each scale  $s \in S$ , features are multiplied across planes and concatenated across scales to obtain tri-plane encoded features. However, coordinate shifts happen due to the limited resolution of the tri-plane grids and errors introduced by linear interpolation. We follow [1] by concatenating encoded tri-plane features with positional

| Method         | Bouncing Balls  |                 |                    |                      | Hell Warrior    |                 |                    |                      | Hook            |                 |                    |                      | Jumping Jacks   |                 |                    |                      |
|----------------|-----------------|-----------------|--------------------|----------------------|-----------------|-----------------|--------------------|----------------------|-----------------|-----------------|--------------------|----------------------|-----------------|-----------------|--------------------|----------------------|
|                | PSNR $\uparrow$ | SSIM $\uparrow$ | LPIPS $\downarrow$ | Average $\downarrow$ | PSNR $\uparrow$ | SSIM $\uparrow$ | LPIPS $\downarrow$ | Average $\downarrow$ | PSNR $\uparrow$ | SSIM $\uparrow$ | LPIPS $\downarrow$ | Average $\downarrow$ | PSNR $\uparrow$ | SSIM $\uparrow$ | LPIPS $\downarrow$ | Average $\downarrow$ |
| D-NeRF [6]     | 38.05           | 0.982           | 0.107              | 0.018                | 24.94           | 0.948           | 0.071              | 0.038                | 29.43           | 0.962           | 0.122              | 0.032                | 31.96           | 0.972           | 0.045              | 0.019                |
| TiNeuVox-B [1] | 40.53           | 0.990           | 0.036              | 0.007                | 28.21           | 0.965           | 0.072              | 0.027                | 32.31           | 0.975           | 0.044              | 0.016                | 34.70           | 0.983           | 0.033              | 0.012                |
| KPlanes [2]    | 41.12           | 0.991           | 0.032              | 0.006                | 25.65           | 0.952           | 0.079              | 0.036                | 28.55           | 0.957           | 0.082              | 0.029                | 32.60           | 0.977           | 0.054              | 0.017                |
| NDVG [4]       | 34.59           | 0.969           | 0.113              | 0.019                | 25.58           | 0.949           | 0.075              | 0.037                | 29.74           | 0.966           | 0.040              | 0.021                | 29.55           | 0.960           | 0.081              | 0.027                |
| V4D [3]        | 42.00           | <b>0.992</b>    | <b>0.029</b>       | <b>0.005</b>         | 27.06           | 0.960           | 0.054              | 0.028                | 30.95           | 0.972           | 0.037              | 0.018                | 35.29           | 0.986           | <b>0.022</b>       | <b>0.010</b>         |
| 4D-GS [9]      | 39.18           | 0.990           | 0.033              | 0.007                | 27.53           | 0.968           | <b>0.042</b>       | 0.024                | 32.13           | 0.978           | <b>0.022</b>       | 0.013                | 34.71           | 0.986           | <b>0.022</b>       | <b>0.010</b>         |
| KFD-NeRF       | <b>42.16</b>    | 0.991           | 0.038              | 0.006                | <b>30.58</b>    | <b>0.978</b>    | 0.051              | <b>0.019</b>         | <b>35.65</b>    | <b>0.990</b>    | 0.034              | <b>0.010</b>         | <b>35.64</b>    | <b>0.988</b>    | 0.041              | 0.011                |
| Method         | Lego            |                 |                    |                      | Mutant          |                 |                    |                      | Stand Up        |                 |                    |                      | T-Rex           |                 |                    |                      |
|                | PSNR $\uparrow$ | SSIM $\uparrow$ | LPIPS $\downarrow$ | Average $\downarrow$ | PSNR $\uparrow$ | SSIM $\uparrow$ | LPIPS $\downarrow$ | Average $\downarrow$ | PSNR $\uparrow$ | SSIM $\uparrow$ | LPIPS $\downarrow$ | Average $\downarrow$ | PSNR $\uparrow$ | SSIM $\uparrow$ | LPIPS $\downarrow$ | Average $\downarrow$ |
| D-NeRF [6]     | 21.70           | 0.842           | 0.169              | 0.077                | 31.19           | 0.973           | 0.029              | 0.016                | 33.41           | 0.980           | 0.023              | 0.012                | 31.30           | 0.972           | 0.043              | 0.018                |
| TiNeuVox-B [1] | 25.17           | 0.924           | 0.075              | 0.040                | 33.76           | 0.979           | 0.031              | 0.013                | 36.03           | 0.985           | 0.021              | 0.009                | 32.74           | 0.979           | 0.033              | 0.014                |
| KPlanes [2]    | 25.52           | <b>0.948</b>    | 0.059              | 0.034                | 24.71           | 0.917           | 0.178              | 0.057                | 33.89           | 0.983           | 0.051              | 0.014                | 31.71           | 0.981           | 0.038              | 0.016                |
| NDVG [4]       | 25.21           | 0.933           | 0.052              | 0.034                | 35.44           | 0.988           | 0.015              | 0.008                | 34.01           | 0.982           | 0.023              | 0.011                | 30.00           | 0.967           | 0.048              | 0.021                |
| V4D [3]        | <b>25.63</b>    | <b>0.948</b>    | <b>0.038</b>       | <b>0.029</b>         | 36.14           | 0.989           | 0.014              | 0.007                | 37.06           | 0.990           | 0.012              | <b>0.006</b>         | 34.21           | 0.987           | <b>0.018</b>       | <b>0.010</b>         |
| 4D-GS [9]      | 25.37           | 0.940           | 0.044              | 0.031                | 37.80           | 0.993           | <b>0.009</b>       | <b>0.005</b>         | 36.82           | 0.990           | <b>0.011</b>       | 0.007                | 32.97           | 0.984           | 0.022              | 0.012                |
| KFD-NeRF       | 25.54           | 0.948           | 0.070              | 0.035                | <b>39.23</b>    | <b>0.995</b>    | 0.039              | 0.007                | <b>39.62</b>    | <b>0.994</b>    | 0.030              | 0.007                | <b>37.40</b>    | <b>0.992</b>    | 0.054              | <b>0.010</b>         |

Table 1: Per-scene quantitative comparisons on synthetic dynamic scenes.

| Method          | Balloon1        |                 |                    |                      | Balloon2        |                 |                    |                      | dynamicFace     |                 |                    |                      | Jumping         |                 |                    |                      |
|-----------------|-----------------|-----------------|--------------------|----------------------|-----------------|-----------------|--------------------|----------------------|-----------------|-----------------|--------------------|----------------------|-----------------|-----------------|--------------------|----------------------|
|                 | PSNR $\uparrow$ | SSIM $\uparrow$ | LPIPS $\downarrow$ | Average $\downarrow$ | PSNR $\uparrow$ | SSIM $\uparrow$ | LPIPS $\downarrow$ | Average $\downarrow$ | PSNR $\uparrow$ | SSIM $\uparrow$ | LPIPS $\downarrow$ | Average $\downarrow$ | PSNR $\uparrow$ | SSIM $\uparrow$ | LPIPS $\downarrow$ | Average $\downarrow$ |
| TiNeuVox-B [1]  | 25.21           | 0.773           | 0.249              | 0.071                | 26.35           | 0.814           | 0.208              | 0.059                | 22.30           | 0.887           | 0.167              | 0.069                | 25.41           | 0.779           | 0.329              | 0.077                |
| KPlanes [2]     | 28.20           | 0.887           | 0.100              | 0.037                | 26.85           | 0.863           | 0.157              | 0.044                | 25.44           | 0.923           | 0.112              | 0.045                | 27.09           | 0.857           | 0.206              | 0.058                |
| Mixvoxels-L [8] | 26.24           | 0.808           | 0.235              | 0.063                | 26.78           | 0.811           | 0.235              | 0.060                | 20.03           | 0.792           | 0.308              | 0.112                | 26.91           | 0.855           | 0.230              | 0.059                |
| V4D [3]         | 27.11           | 0.888           | 0.101              | 0.040                | 24.55           | 0.847           | 0.148              | 0.059                | <b>27.20</b>    | <b>0.951</b>    | <b>0.083</b>       | <b>0.033</b>         | <b>27.78</b>    | <b>0.883</b>    | <b>0.175</b>       | <b>0.049</b>         |
| KFD-NeRF        | <b>28.83</b>    | <b>0.906</b>    | <b>0.076</b>       | <b>0.031</b>         | <b>27.30</b>    | <b>0.888</b>    | <b>0.089</b>       | <b>0.038</b>         | 26.45           | 0.937           | 0.092              | 0.037                | 26.93           | 0.845           | 0.215              | 0.061                |
| Method          | Playground      |                 |                    |                      | Skating         |                 |                    |                      | Truck           |                 |                    |                      | Umbrella        |                 |                    |                      |
|                 | PSNR $\uparrow$ | SSIM $\uparrow$ | LPIPS $\downarrow$ | Average $\downarrow$ | PSNR $\uparrow$ | SSIM $\uparrow$ | LPIPS $\downarrow$ | Average $\downarrow$ | PSNR $\uparrow$ | SSIM $\uparrow$ | LPIPS $\downarrow$ | Average $\downarrow$ | PSNR $\uparrow$ | SSIM $\uparrow$ | LPIPS $\downarrow$ | Average $\downarrow$ |
| TiNeuVox-B [1]  | 16.60           | 0.376           | 0.461              | 0.200                | 27.93           | 0.840           | 0.276              | 0.056                | 25.78           | 0.765           | 0.356              | 0.077                | 25.56           | 0.636           | 0.381              | 0.086                |
| KPlanes [2]     | 24.59           | 0.836           | 0.152              | 0.060                | 34.06           | 0.956           | 0.092              | 0.020                | 32.93           | 0.925           | 0.118              | 0.025                | 26.84           | 0.801           | 0.159              | 0.057                |
| Mixvoxels-L [8] | 23.19           | 0.748           | 0.253              | 0.085                | 33.14           | 0.945           | 0.148              | 0.026                | 32.60           | 0.920           | 0.133              | 0.027                | 26.70           | 0.748           | 0.236              | 0.063                |
| V4D [3]         | <b>25.69</b>    | <b>0.875</b>    | <b>0.100</b>       | <b>0.046</b>         | 33.79           | 0.956           | 0.115              | 0.022                | 32.95           | 0.930           | 0.126              | 0.026                | 26.24           | 0.742           | 0.237              | 0.066                |
| KFD-NeRF        | 24.59           | 0.846           | 0.129              | 0.056                | <b>34.95</b>    | <b>0.964</b>    | <b>0.077</b>       | <b>0.017</b>         | <b>33.44</b>    | <b>0.930</b>    | <b>0.100</b>       | <b>0.023</b>         | <b>27.49</b>    | <b>0.815</b>    | <b>0.146</b>       | <b>0.048</b>         |

Table 2: Per-scene quantitative comparisons on real dynamic scenes.

| Model            | PSNR(dB) $\uparrow$ | SSIM $\uparrow$ | LPIPS $\downarrow$ | Training Time $\downarrow$ | Params(MB) $\downarrow$ |
|------------------|---------------------|-----------------|--------------------|----------------------------|-------------------------|
| MLP Based        | 32.13               | 0.971           | 0.052              | 43hrs                      | <b>0.5</b>              |
| Voxel Grid Based | 36.21               | 0.984           | <b>0.029</b>       | <b>60mins</b>              | 2336                    |
| Tri-plane Based  | <b>38.92</b>        | <b>0.990</b>    | 0.037              | 150mins                    | 31.5                    |

Table 3: Ablation Study on Spatial Representations. We compare three different spatial models on rendering quality, training time and spatial-only size. The tri-plane model we choose significantly reduces the model size compared to the voxel grid based model and achieves the highest rendering quality in a relatively short training time.

encoded [7] raw inputs. Our Sigma Net (single-hidden-layer MLP) outputs volume density  $\sigma$  and 15-dimensional geometry features. The geometry features will be further concatenated with spherical harmonics encoded view directions for color calculation using Color Net (two-hidden-layer MLP).

### 3 Model Hyperparameters

The frequency number of positional encoding is set to 5 for both spatial and temporal inputs. Our shallow observation MLP consists of two hidden layers,

each has a channel dimension of 128. As for the tri-plane grids, we use multi-scale planes with 4 different resolutions at  $64^2$ ,  $128^2$ ,  $256^2$  and  $512^2$ . As can be seen in Fig. 1, the per-plane and per-scale features are multiplied across planes and concatenated across scales. We set each of these per-plane and per-scale features’ dimension to be 32 so the final encoded feature has dimension 128. Sigma Net has single hidden layer with channel dimension 64 and Color Net has two hidden layers with channel dimension 64.

For optimization, an Adam optimizer [5] is used and we set ray batch to be 4096 in each iteration. We train our KFD-NeRF with learning rate set to  $1 \times 10^{-3}$ .

## 4 Ablation Study on Spatial Representations

In Section 4.3, we analyze the characteristics of different spatial representations and their reconstruction capabilities in the canonical space. Based on our full model, we further conduct ablation studies by only changing spatial representations to show their impacts on reconstruction results.

Specifically, we compare three different spatial models, namely, pure MLP (8 hidden layers with dimension 256), multi-scale voxel grid (resolutions at  $64^3$ ,  $128^3$  and  $256^3$ ) and multi-scale tri-plane (resolutions at  $64^2$ ,  $128^2$  and  $256^2$ ). In Tab. 3, We compare these models based on three dimensions: model size, convergence time, and rendering quality.

Our full model only uses a shallow MLP with two hidden layers to calculate deformations, so the pure spatial MLP would suffer from convergence difficulties. The voxel grid based model converges faster while the model size is far from acceptable. Therefore we choose the tri-plane based model as a spatial model that converges relatively fast, has a moderate size, and provides high rendering quality.

## References

1. Fang, J., Yi, T., Wang, X., Xie, L., Zhang, X., Liu, W., Nießner, M., Tian, Q.: Fast Dynamic Radiance Fields with Time-aware Neural Voxels. In: SIGGRAPH Asia 2022 Conference Papers. pp. 1–9 (2022)
2. Fridovich-Keil, S., Meanti, G., Warburg, F.R., Recht, B., Kanazawa, A.: K-planes: Explicit Radiance Fields in Space, Time, and Appearance. In: Proceedings of the IEEE/CVF Conference on Computer Vision and Pattern Recognition. pp. 12479–12488 (2023)
3. Gan, W., Xu, H., Huang, Y., Chen, S., Yokoya, N.: V4D: Voxel for 4D Novel View Synthesis. *IEEE Transactions on Visualization and Computer Graphics* (2023)
4. Guo, X., Chen, G., Dai, Y., Ye, X., Sun, J., Tan, X., Ding, E.: Neural Deformable Voxel Grid for Fast Optimization of Dynamic View Synthesis. In: Proceedings of the Asian Conference on Computer Vision. pp. 3757–3775 (2022)
5. Kingma, D.P., Ba, J.: Adam: A method for Stochastic Optimization. arXiv preprint arXiv:1412.6980 (2014)

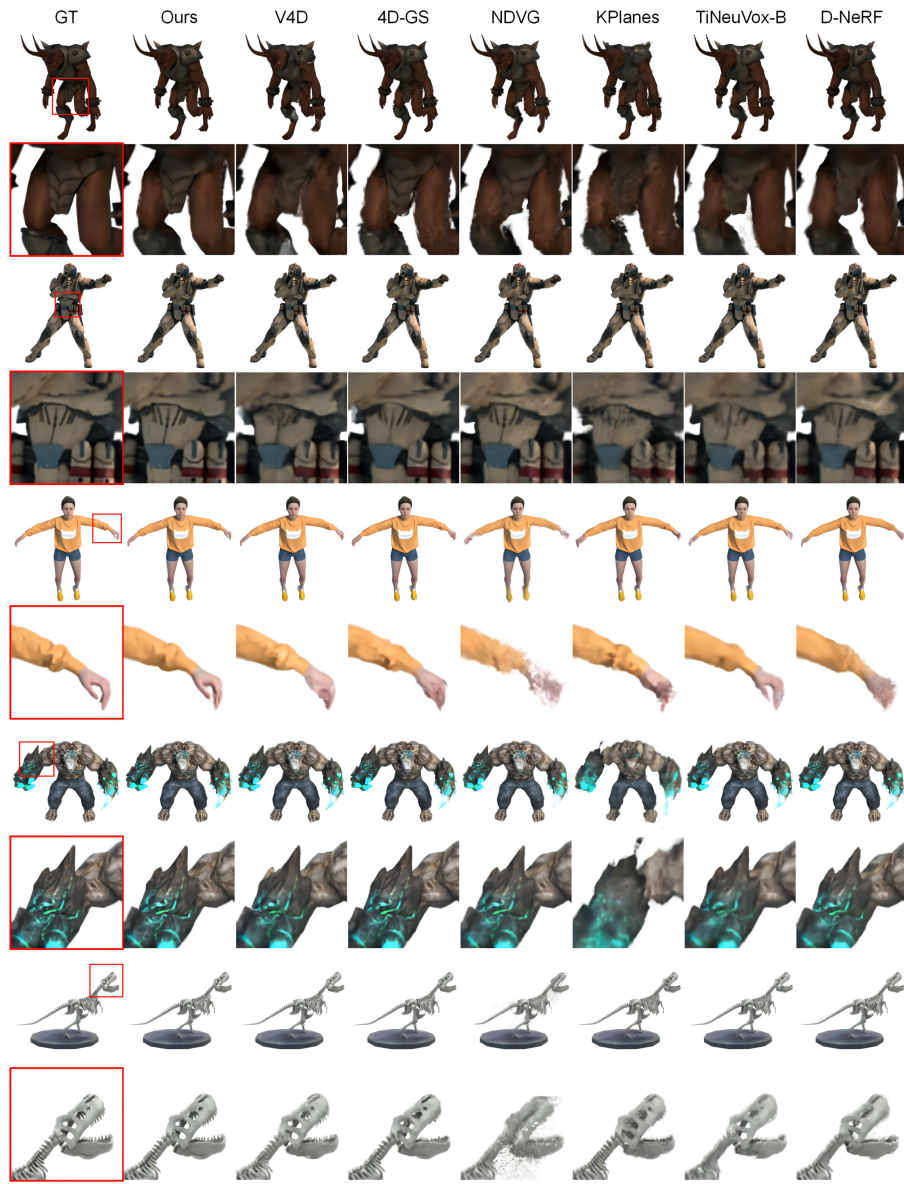

**Fig. 2:** More qualitative results on synthetic data. Zoom in for better details.

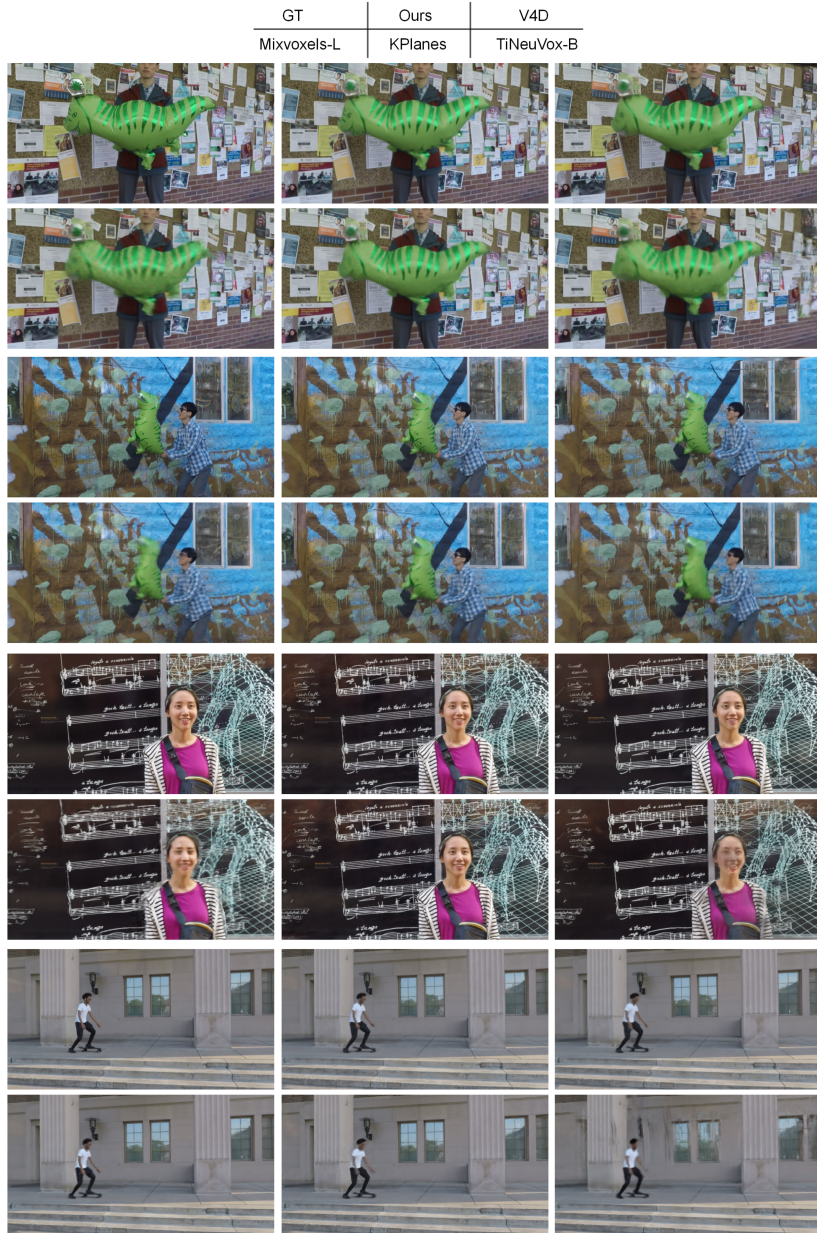

Fig. 3: More qualitative results on real data. Zoom in for better details.

6. Pumarola, A., Corona, E., Pons-Moll, G., Moreno-Noguer, F.: D-neRF: Neural Radiance Fields for Dynamic Scenes. In: Proceedings of the IEEE/CVF Conference on Computer Vision and Pattern Recognition. pp. 10318–10327 (2021)
7. Rahaman, N., Baratin, A., Arpit, D., Draxler, F., Lin, M., Hamprecht, F., Bengio, Y., Courville, A.: On the Spectral Bias of Neural Networks. In: International Conference on Machine Learning. pp. 5301–5310. PMLR (2019)
8. Wang, F., Tan, S., Li, X., Tian, Z., Song, Y., Liu, H.: Mixed Neural Voxels for Fast Multi-view Video Synthesis. In: Proceedings of the IEEE/CVF International Conference on Computer Vision. pp. 19706–19716 (2023)
9. Wu, G., Yi, T., Fang, J., Xie, L., Zhang, X., Wei, W., Liu, W., Tian, Q., Wang, X.: 4D Gaussian Splatting for Real-Time Dynamic Scene Rendering. arXiv preprint arXiv:2310.08528 (2023)
